# Supplementary material for: A simple peptidomimetic that self-associates on the solid state to form a nanoporous architecture containing chiral π-channels
Source: Royal Society of Chemistry journal article supplement (doi:10.1039/b922172g), 2010-01-01
Supplement: b922172g.pdf [file b922172g.pdf]

data\_4c

```
_audit_creation_method          SHELXL-97
_chemical_name_systematic
;
?
;
_chemical_name_common           ?
_chemical_melting_point         ?
_chemical_formula_moiety        ?
_chemical_formula_sum           'C22 H30 N4 O2'
_chemical_formula_weight        382.50

loop_
  _atom_type_symbol
  _atom_type_description
  _atom_type_scatter_dispersion_real
  _atom_type_scatter_dispersion_imag
  _atom_type_scatter_source
  'C' 'C' 0.0033 0.0016
  'International Tables Vol C Tables 4.2.6.8 and 6.1.1.4'
  'H' 'H' 0.0000 0.0000
  'International Tables Vol C Tables 4.2.6.8 and 6.1.1.4'
  'N' 'N' 0.0061 0.0033
  'International Tables Vol C Tables 4.2.6.8 and 6.1.1.4'
  'O' 'O' 0.0106 0.0060
  'International Tables Vol C Tables 4.2.6.8 and 6.1.1.4'

_symmetry_cell_setting          ?
_symmetry_space_group_name_H-M ?

loop_
  _symmetry_equiv_pos_as_xyz
  'x, y, z'
  '-x, y+1/2, -z'

_cell_length_a                  5.5416(11)
_cell_length_b                  43.066(9)
_cell_length_c                  8.7604(18)
_cell_angle_alpha               90.00
_cell_angle_beta                90.01(3)
_cell_angle_gamma               90.00
_cell_volume                    2090.7(7)
_cell_formula_units_Z           4
_cell_measurement_temperature    293(2)
_cell_measurement_reflns_used    ?
_cell_measurement_theta_min      ?
_cell_measurement_theta_max      ?

_exptl_crystal_description      ?
_exptl_crystal_colour           ?
_exptl_crystal_size_max         ?
_exptl_crystal_size_mid         ?
_exptl_crystal_size_min         ?
_exptl_crystal_density_meas     ?
_exptl_crystal_density_diffn    1.215
_exptl_crystal_density_method   'not measured'
_exptl_crystal_F_000            824
_exptl_absorpt_coefficient_mu    0.079
_exptl_absorpt_correction_type   ?
_exptl_absorpt_correction_T_min ?
_exptl_absorpt_correction_T_max ?
_exptl_absorpt_process_details  ?
```

```
_exptl_special_details
;
?
;

_diffrn_ambient_temperature      293(2)
_diffrn_radiation_wavelength     0.71073
_diffrn_radiation_type           MoK\alpha
_diffrn_radiation_source         'fine-focus sealed tube'
_diffrn_radiation_monochromator  graphite
_diffrn_measurement_device_type  ?
_diffrn_measurement_method      ?
_diffrn_detector_area_resol_mean ?
_diffrn_standards_number        ?
_diffrn_standards_interval_count ?
_diffrn_standards_interval_time ?
_diffrn_standards_decay_%       ?
_diffrn_reflns_number           20001
_diffrn_reflns_av_R_equivalents 0.0650
_diffrn_reflns_av_sigmaI/netI   0.0643
_diffrn_reflns_limit_h_min      -6
_diffrn_reflns_limit_h_max      6
_diffrn_reflns_limit_k_min      -52
_diffrn_reflns_limit_k_max      52
_diffrn_reflns_limit_l_min      -10
_diffrn_reflns_limit_l_max      10
_diffrn_reflns_theta_min        1.42
_diffrn_reflns_theta_max        25.68
_reflns_number_total            7895
_reflns_number_gt               5617
_reflns_threshold_expression     >2sigma(I)

_computing_data_collection      ?
_computing_cell_refinement      ?
_computing_data_reduction       ?
_computing_structure_solution   'SHELXS-97 (Sheldrick, 1990)'
_computing_structure_refinement 'SHELXL-97 (Sheldrick, 1997)'
_computing_molecular_graphics   ?
_computing_publication_material ?

_refine_special_details
;
Refinement of F2 against ALL reflections. The weighted R-factor wR and
goodness of fit S are based on F2, conventional R-factors R are based
on F, with F set to zero for negative F2. The threshold expression of
F2 > 2sigma(F2) is used only for calculating R-factors(gt) etc. and is
not relevant to the choice of reflections for refinement. R-factors based
on F2 are statistically about twice as large as those based on F, and R-
factors based on ALL data will be even larger.
;

_refine_ls_structure_factor_coef Fsqd
_refine_ls_matrix_type          full
_refine_ls_weighting_scheme     calc
_refine_ls_weighting_details
'calc w=1/[\s2(Fo2)+(0.1176P)2+0.0000P] where P=(Fo2+2Fc2)/3'
_atom_sites_solution_primary    direct
_atom_sites_solution_secondary  difmap
_atom_sites_solution_hydrogens  geom
_refine_ls_hydrogen_treatment  mixed
_refine_ls_extinction_method     SHELXL
_refine_ls_extinction_coef       0.031(3)
_refine_ls_extinction_expression
'Fc2=kFc[1+0.001xFc2\l3/sin(2\q)]-1/4'
```

```
_refine_ls_abs_structure_details  
'Flack H D (1983), Acta Cryst. A39, 876-881'  
_refine_ls_abs_structure_Flack      1(2)  
_refine_ls_number_reflns           7895  
_refine_ls_number_parameters        485  
_refine_ls_number_restraints        29  
_refine_ls_R_factor_all             0.0813  
_refine_ls_R_factor_gt              0.0628  
_refine_ls_wR_factor_ref            0.1778  
_refine_ls_wR_factor_gt             0.1656  
_refine_ls_goodness_of_fit_ref      0.955  
_refine_ls_restrained_S_all         0.961  
_refine_ls_shift/su_max             0.625  
_refine_ls_shift/su_mean            0.033
```

loop\_

```
_atom_site_label  
_atom_site_type_symbol  
_atom_site_fract_x  
_atom_site_fract_y  
_atom_site_fract_z  
_atom_site_U_iso_or_equiv  
_atom_site_adp_type  
_atom_site_occupancy  
_atom_site_symmetry_multiplicity  
_atom_site_calc_flag  
_atom_site_refinement_flags  
_atom_site_disorder_assembly  
_atom_site_disorder_group  
C1 C 1.7605(9) 0.17349(10) -0.1261(6) 0.0506(11) Uani 1 1 d . . .  
H1A H 1.6717 0.1735 -0.2215 0.061 Uiso 1 1 calc R . .  
H1B H 1.9289 0.1773 -0.1499 0.061 Uiso 1 1 calc R . .  
C11 C 1.7386(9) 0.14168(10) -0.0535(5) 0.0477(11) Uani 1 1 d . . .  
C12 C 1.5442(9) 0.12291(12) -0.0839(7) 0.0575(13) Uani 1 1 d . . .  
H12 H 1.4234 0.1295 -0.1500 0.069 Uiso 1 1 calc R . .  
C13 C 1.5297(11) 0.09394(13) -0.0149(7) 0.0630(14) Uani 1 1 d . . .  
H13 H 1.3952 0.0816 -0.0332 0.076 Uiso 1 1 calc R . .  
C14 C 1.7064(11) 0.08319(11) 0.0783(7) 0.0613(14) Uani 1 1 d . . .  
H14 H 1.6947 0.0635 0.1216 0.074 Uiso 1 1 calc R . .  
C15 C 1.9036(11) 0.10180(11) 0.1080(7) 0.0620(14) Uani 1 1 d . . .  
H15 H 2.0252 0.0950 0.1732 0.074 Uiso 1 1 calc R . .  
C16 C 1.9180(9) 0.13146(11) 0.0377(6) 0.0541(12) Uani 1 1 d . . .  
H16 H 2.0524 0.1439 0.0546 0.065 Uiso 1 1 calc R . .  
C2 C 1.6670(8) 0.20009(10) -0.0260(5) 0.0454(11) Uani 1 1 d . . .  
H2 H 1.7502 0.1996 0.0727 0.054 Uiso 1 1 calc R . .  
N1 N 1.4050(8) 0.19792(10) -0.0006(5) 0.0572(11) Uani 1 1 d . . .  
H1C H 1.3116 0.2126 -0.0312 0.069 Uiso 1 1 calc R . .  
H1D H 1.3453 0.1820 0.0447 0.069 Uiso 1 1 calc R . .  
C3 C 1.7297(9) 0.23063(11) -0.1090(5) 0.0488(11) Uani 1 1 d . . .  
O3 O 1.6446(7) 0.23727(8) -0.2338(4) 0.0615(9) Uani 1 1 d . . .  
N2 N 1.8930(9) 0.24871(9) -0.0385(5) 0.0555(11) Uani 1 1 d D A .  
H2A H 1.9344 0.2445 0.0539 0.067 Uiso 1 1 d R . .  
C4 C 2.0070(12) 0.27541(13) -0.1137(7) 0.0674(14) Uiso 1 1 d D . .  
H4A1 H 2.1668 0.2695 -0.1484 0.081 Uiso 0.621(9) 1 calc PR A 1  
H4B2 H 1.9127 0.2812 -0.2026 0.081 Uiso 0.621(9) 1 calc PR A 1  
H4C H 1.9548 0.2749 -0.2194 0.081 Uiso 0.379(9) 1 d PR A 2  
H4D H 1.9334 0.2937 -0.0688 0.081 Uiso 0.379(9) 1 d PR A 2  
C5 C 2.0267(19) 0.30229(18) -0.0112(10) 0.061(3) Uiso 0.621(9) 1 d PD A 1  
H5A H 2.1316 0.2966 0.0730 0.073 Uiso 0.621(9) 1 calc PR A 1  
H5B H 1.8683 0.3064 0.0311 0.073 Uiso 0.621(9) 1 calc PR A 1  
C6 C 2.126(2) 0.3336(2) -0.0844(13) 0.070(3) Uiso 0.621(9) 1 d PD A 1  
H6A H 2.0321 0.3390 -0.1739 0.084 Uiso 0.621(9) 1 calc PR A 1  
H6B H 2.1138 0.3504 -0.0113 0.084 Uiso 0.621(9) 1 calc PR A 1  
C7 C 2.3744(14) 0.32874(15) -0.1260(8) 0.0818(17) Uiso 1 1 d D . .  
H7A H 2.3873 0.3146 -0.2118 0.098 Uiso 0.621(9) 1 calc PR A 1
```

H7B H 2.4658 0.3204 -0.0409 0.098 Uiso 0.621(9) 1 calc PR A 1  
H7C H 2.5178 0.3194 -0.0819 0.098 Uiso 0.379(9) 1 d PR A 2  
H7D H 2.2640 0.3318 -0.0414 0.098 Uiso 0.379(9) 1 d PR A 2  
C5' C 2.206(2) 0.2789(3) -0.1147(17) 0.058(4) Uiso 0.379(9) 1 d PD A 2  
H5'1 H 2.2788 0.2614 -0.1672 0.070 Uiso 0.379(9) 1 calc PR A 2  
H5'2 H 2.2629 0.2784 -0.0100 0.070 Uiso 0.379(9) 1 calc PR A 2  
C6' C 2.298(3) 0.3084(3) -0.1881(17) 0.066(4) Uiso 0.379(9) 1 d PD A 2  
H6'1 H 2.4214 0.3020 -0.2601 0.080 Uiso 0.379(9) 1 calc PR A 2  
H6'2 H 2.1654 0.3164 -0.2486 0.080 Uiso 0.379(9) 1 calc PR A 2  
N3 N 2.4610(13) 0.36019(12) -0.1679(5) 0.093(2) Uani 1 1 d D A .  
H3 H 2.4190 0.3694 -0.2510 0.112 Uiso 1 1 d R . .  
C8 C 2.5934(11) 0.37715(11) -0.0763(6) 0.0548(12) Uani 1 1 d . . .  
O8 O 2.6281(8) 0.37024(8) 0.0611(4) 0.0663(10) Uani 1 1 d . A .  
C9 C 2.5399(11) 0.43362(11) -0.0901(7) 0.0668(16) Uani 1 1 d . . .  
H9A H 2.3784 0.4300 -0.1290 0.080 Uiso 1 1 calc R A .  
H9B H 2.5308 0.4339 0.0205 0.080 Uiso 1 1 calc R . .  
C91 C 2.6257(11) 0.46499(12) -0.1446(6) 0.0558(13) Uani 1 1 d . A .  
C92 C 2.5016(11) 0.48137(12) -0.2563(7) 0.0606(13) Uani 1 1 d . . .  
H92 H 2.3628 0.4727 -0.2981 0.073 Uiso 1 1 calc R A .  
C93 C 2.5768(13) 0.50982(13) -0.3070(7) 0.0718(16) Uani 1 1 d . A .  
H93 H 2.4904 0.5204 -0.3815 0.086 Uiso 1 1 calc R . .  
C94 C 2.7891(13) 0.52273(13) -0.2433(8) 0.0745(17) Uani 1 1 d . . .  
H94 H 2.8456 0.5419 -0.2771 0.089 Uiso 1 1 calc R A .  
C95 C 2.9096(11) 0.50702(13) -0.1329(7) 0.0655(15) Uani 1 1 d . A .  
H95 H 3.0472 0.5159 -0.0907 0.079 Uiso 1 1 calc R . .  
C96 C 2.8362(11) 0.47849(13) -0.0810(7) 0.0663(15) Uani 1 1 d . . .  
H96 H 2.9230 0.4682 -0.0056 0.080 Uiso 1 1 calc R A .  
C10 C 2.7034(10) 0.40656(11) -0.1400(5) 0.0513(12) Uani 1 1 d . A .  
H10 H 2.8639 0.4095 -0.0951 0.062 Uiso 1 1 calc R . .  
N4 N 2.7257(9) 0.40537(9) -0.3020(4) 0.0531(10) Uani 1 1 d . . .  
H4A H 2.6522 0.4188 -0.3578 0.064 Uiso 1 1 calc R A .  
H4B H 2.8128 0.3912 -0.3440 0.064 Uiso 1 1 calc R . .  
C1A C 1.0669(12) 0.17229(12) 0.3954(6) 0.0636(15) Uani 1 1 d . . .  
H1A1 H 0.9034 0.1746 0.4334 0.076 Uiso 1 1 calc R . .  
H1A2 H 1.0592 0.1719 0.2848 0.076 Uiso 1 1 calc R . .  
C11A C 1.1657(10) 0.14221(11) 0.4499(6) 0.0539(12) Uani 1 1 d . . .  
C12A C 1.3746(10) 0.12987(11) 0.3889(6) 0.0559(12) Uani 1 1 d . . .  
H12A H 1.4531 0.1402 0.3100 0.067 Uiso 1 1 calc R . .  
C13A C 1.4696(11) 0.10187(12) 0.4450(7) 0.0673(15) Uani 1 1 d . . .  
H13A H 1.6111 0.0939 0.4035 0.081 Uiso 1 1 calc R . .  
C14A C 1.3542(13) 0.08606(12) 0.5612(7) 0.0700(16) Uani 1 1 d . . .  
H14A H 1.4185 0.0676 0.5978 0.084 Uiso 1 1 calc R . .  
C15A C 1.1443(12) 0.09764(13) 0.6229(8) 0.0725(16) Uani 1 1 d . . .  
H15A H 1.0646 0.0870 0.7004 0.087 Uiso 1 1 calc R . .  
C16A C 1.0529(9) 0.12587(13) 0.5663(7) 0.0635(15) Uani 1 1 d . . .  
H16A H 0.9118 0.1338 0.6083 0.076 Uiso 1 1 calc R . .  
C2A C 1.2165(9) 0.20071(10) 0.4458(5) 0.0448(10) Uani 1 1 d . . .  
H2B H 1.3806 0.1990 0.4050 0.054 Uiso 1 1 calc R . .  
N1A N 1.2261(8) 0.20159(9) 0.6138(4) 0.0526(10) Uani 1 1 d . . .  
H1A3 H 1.1666 0.2172 0.6623 0.063 Uiso 1 1 calc R . .  
H1A4 H 1.2911 0.1865 0.6634 0.063 Uiso 1 1 calc R . .  
C3A C 1.0971(12) 0.22891(14) 0.3811(6) 0.0668(15) Uani 1 1 d . . .  
O3A O 1.1351(8) 0.23663(9) 0.2429(4) 0.0696(11) Uani 1 1 d . . .  
N2A N 0.9548(12) 0.24476(13) 0.4723(5) 0.095(2) Uani 1 1 d D B .  
H2A1 H 0.9122 0.2371 0.5588 0.115 Uiso 1 1 d R . .  
C4A C 0.7565(17) 0.26638(17) 0.4124(10) 0.096(2) Uiso 1 1 d D . .  
H4E H 0.8165 0.2851 0.4611 0.116 Uiso 0.401(11) 1 calc PR B 1  
H4F H 0.8183 0.2679 0.3091 0.116 Uiso 0.401(11) 1 calc PR B 1  
H4G H 0.8085 0.2702 0.3084 0.116 Uiso 0.599(11) 1 d PR B 2  
H4H H 0.5899 0.2596 0.4061 0.116 Uiso 0.599(11) 1 d PR B 2  
C5A C 0.608(2) 0.2738(2) 0.3915(13) 0.042(3) Uiso 0.401(11) 1 d PD B 1  
H5A1 H 0.5258 0.2730 0.4893 0.050 Uiso 0.401(11) 1 calc PR B 1  
H5A2 H 0.5346 0.2575 0.3308 0.050 Uiso 0.401(11) 1 calc PR B 1  
C6A C 0.513(2) 0.3032(2) 0.3197(11) 0.032(3) Uiso 0.401(11) 1 d PD B 1  
H6A1 H 0.6252 0.3094 0.2405 0.038 Uiso 0.401(11) 1 calc PR B 1

H6A2 H 0.3611 0.2983 0.2700 0.038 Uiso 0.401(11) 1 calc PR B 1  
C7A C 0.4758(13) 0.32795(13) 0.4117(8) 0.0737(16) Uiso 1 1 d D . .  
H7E H 0.6273 0.3327 0.4622 0.088 Uiso 0.401(11) 1 calc PR B 1  
H7F H 0.3625 0.3217 0.4904 0.088 Uiso 0.401(11) 1 calc PR B 1  
H7G H 0.4609 0.3294 0.5218 0.088 Uiso 0.599(11) 1 d PR B 2  
H7H H 0.3779 0.3106 0.3779 0.088 Uiso 0.599(11) 1 d PR B 2  
C5" C 0.870(3) 0.2885(3) 0.4393(19) 0.112(5) Uiso 0.599(11) 1 d PD B 2  
H5"1 H 1.0316 0.2865 0.3979 0.134 Uiso 0.599(11) 1 calc PR B 2  
H5"2 H 0.8814 0.2917 0.5486 0.134 Uiso 0.599(11) 1 calc PR B 2  
C6" C 0.714(4) 0.3198(4) 0.351(2) 0.138(6) Uiso 0.599(11) 1 d PD B 2  
H6"1 H 0.8159 0.3381 0.3576 0.166 Uiso 0.599(11) 1 calc PR B 2  
H6"2 H 0.6955 0.3149 0.2436 0.166 Uiso 0.599(11) 1 calc PR B 2  
N3A N 0.3864(9) 0.35651(9) 0.3435(5) 0.0605(12) Uani 1 1 d D B .  
H3A H 0.4362 0.3613 0.2536 0.073 Uiso 1 1 d R . .  
C8A C 0.2270(9) 0.37501(11) 0.4153(6) 0.0510(12) Uani 1 1 d . . .  
O8A O 0.1431(8) 0.36847(8) 0.5423(4) 0.0623(9) Uani 1 1 d . B .  
C9A C 0.2539(10) 0.43170(10) 0.4351(6) 0.0524(12) Uani 1 1 d . . .  
H9A1 H 0.1648 0.4316 0.5304 0.063 Uiso 1 1 calc R B .  
H9A2 H 0.4220 0.4279 0.4595 0.063 Uiso 1 1 calc R . .  
C91A C 0.2342(9) 0.46345(11) 0.3666(5) 0.0479(11) Uani 1 1 d . B .  
C92A C 0.4148(9) 0.47520(11) 0.2724(6) 0.0534(12) Uani 1 1 d . . .  
H92A H 0.5509 0.4633 0.2511 0.064 Uiso 1 1 calc R B .  
C93A C 0.3905(11) 0.50477(13) 0.2102(6) 0.0654(14) Uani 1 1 d . B .  
H93A H 0.5072 0.5119 0.1425 0.078 Uiso 1 1 calc R . .  
C94A C 0.2015(12) 0.52355(13) 0.2455(8) 0.0716(16) Uani 1 1 d . . .  
H94A H 0.1910 0.5435 0.2058 0.086 Uiso 1 1 calc R B .  
C95A C 0.0232(11) 0.51201(13) 0.3429(7) 0.0625(14) Uani 1 1 d . B .  
H95A H -0.1067 0.5246 0.3695 0.075 Uiso 1 1 calc R . .  
C96A C 0.0374(10) 0.48254(11) 0.3995(8) 0.0627(15) Uani 1 1 d . . .  
H96A H -0.0862 0.4750 0.4611 0.075 Uiso 1 1 calc R B .  
C10A C 0.1618(9) 0.40473(11) 0.3357(6) 0.0480(11) Uani 1 1 d . B .  
H10A H 0.2435 0.4054 0.2365 0.058 Uiso 1 1 calc R . .  
N4A N -0.0954(8) 0.40871(9) 0.3125(5) 0.0530(10) Uani 1 1 d . . .  
H4A1 H -0.1945 0.3947 0.3436 0.064 Uiso 1 1 calc R B .  
H4A2 H -0.1490 0.4251 0.2677 0.064 Uiso 1 1 calc R . .

loop\_

\_atom\_site\_aniso\_label  
\_atom\_site\_aniso\_U\_11  
\_atom\_site\_aniso\_U\_22  
\_atom\_site\_aniso\_U\_33  
\_atom\_site\_aniso\_U\_23  
\_atom\_site\_aniso\_U\_13  
\_atom\_site\_aniso\_U\_12  
C1 0.041(3) 0.060(3) 0.051(3) 0.007(2) 0.004(2) -0.002(2)  
C11 0.044(3) 0.050(2) 0.049(3) -0.005(2) 0.008(2) -0.002(2)  
C12 0.044(3) 0.058(3) 0.071(4) -0.006(3) -0.012(2) -0.008(2)  
C13 0.051(3) 0.061(3) 0.077(4) -0.010(3) -0.001(3) -0.001(3)  
C14 0.071(4) 0.049(3) 0.064(3) -0.010(2) 0.012(3) 0.010(3)  
C15 0.066(3) 0.055(3) 0.064(3) -0.009(2) -0.011(3) 0.019(3)  
C16 0.043(3) 0.056(3) 0.063(3) -0.014(2) -0.006(2) 0.004(2)  
C2 0.046(2) 0.044(2) 0.046(2) -0.006(2) -0.003(2) -0.008(2)  
N1 0.046(2) 0.056(2) 0.070(3) 0.002(2) 0.010(2) -0.006(2)  
C3 0.051(3) 0.054(3) 0.041(2) 0.006(2) 0.006(2) 0.003(2)  
O3 0.063(2) 0.070(2) 0.051(2) 0.0075(17) -0.0170(19) -0.0142(19)  
N2 0.081(3) 0.049(2) 0.037(2) 0.0094(17) -0.013(2) -0.021(2)  
N3 0.143(6) 0.087(3) 0.050(3) 0.018(2) -0.027(3) -0.069(4)  
C8 0.070(3) 0.054(3) 0.040(3) 0.005(2) 0.002(3) -0.016(3)  
O8 0.090(3) 0.077(2) 0.0319(17) 0.0073(16) -0.0067(19) -0.026(2)  
C9 0.064(4) 0.060(3) 0.077(4) -0.004(3) 0.016(3) -0.012(3)  
C91 0.055(3) 0.057(3) 0.055(3) -0.021(2) 0.012(3) -0.002(2)  
C92 0.064(3) 0.062(3) 0.056(3) -0.016(3) 0.006(3) -0.008(3)  
C93 0.090(5) 0.059(3) 0.066(3) -0.009(3) -0.002(3) -0.003(3)  
C94 0.087(4) 0.049(3) 0.087(4) -0.005(3) 0.004(4) -0.010(3)  
C95 0.065(4) 0.059(3) 0.072(4) -0.010(3) 0.005(3) -0.012(3)

C96 0.065(3) 0.078(4) 0.056(3) -0.011(3) -0.003(3) 0.001(3)  
C10 0.054(3) 0.061(3) 0.039(2) 0.000(2) 0.000(2) -0.016(2)  
N4 0.069(3) 0.055(2) 0.035(2) 0.0071(18) 0.001(2) 0.004(2)  
C1A 0.067(3) 0.072(3) 0.052(3) -0.020(3) -0.026(3) 0.011(3)  
C11A 0.053(3) 0.057(3) 0.051(3) -0.014(2) -0.010(2) -0.002(2)  
C12A 0.061(3) 0.052(3) 0.055(3) -0.011(2) -0.007(3) 0.003(3)  
C13A 0.064(3) 0.065(3) 0.073(4) -0.019(3) 0.003(3) 0.010(3)  
C14A 0.092(4) 0.052(3) 0.065(3) -0.008(3) 0.000(3) 0.005(3)  
C15A 0.077(4) 0.056(3) 0.084(4) 0.002(3) 0.018(4) -0.015(3)  
C16A 0.046(3) 0.073(3) 0.071(4) -0.018(3) 0.004(3) -0.011(3)  
C2A 0.059(3) 0.047(2) 0.029(2) 0.0006(19) -0.009(2) 0.010(2)  
N1A 0.073(3) 0.0483(19) 0.0360(19) -0.0019(17) -0.014(2) 0.013(2)  
C3A 0.080(4) 0.081(4) 0.040(3) 0.001(3) 0.010(3) 0.018(4)  
O3A 0.089(3) 0.083(2) 0.0368(19) 0.0075(17) 0.006(2) 0.031(2)  
N2A 0.145(6) 0.095(3) 0.047(3) 0.018(2) 0.029(3) 0.081(4)  
N3A 0.077(3) 0.051(2) 0.053(2) 0.0104(18) 0.020(2) 0.024(2)  
C8A 0.050(3) 0.057(3) 0.046(3) 0.008(2) 0.004(2) 0.011(2)  
O8A 0.076(2) 0.062(2) 0.0484(19) 0.0058(16) 0.0182(19) 0.0061(19)  
C9A 0.058(3) 0.052(3) 0.048(3) -0.001(2) -0.003(3) 0.001(2)  
C91A 0.046(3) 0.056(3) 0.041(3) -0.004(2) 0.006(2) 0.002(2)  
C92A 0.045(3) 0.055(3) 0.060(3) -0.004(2) 0.004(2) -0.004(2)  
C93A 0.066(3) 0.070(3) 0.060(3) 0.005(3) 0.017(3) -0.008(3)  
C94A 0.085(4) 0.053(3) 0.077(4) 0.005(3) 0.000(4) 0.005(3)  
C95A 0.058(3) 0.055(3) 0.074(4) 0.008(3) 0.006(3) 0.006(3)  
C96A 0.050(3) 0.048(3) 0.089(4) 0.000(3) 0.017(3) -0.004(2)  
C10A 0.050(3) 0.051(2) 0.043(2) 0.006(2) 0.011(2) 0.007(2)  
N4A 0.049(2) 0.048(2) 0.062(3) 0.0054(19) -0.010(2) 0.0070(19)

\_geom\_special\_details

;

All esds (except the esd in the dihedral angle between two l.s. planes) are estimated using the full covariance matrix. The cell esds are taken into account individually in the estimation of esds in distances, angles and torsion angles; correlations between esds in cell parameters are only used when they are defined by crystal symmetry. An approximate (isotropic)

treatment of cell esds is used for estimating esds involving l.s. planes.

;

loop\_

\_geom\_bond\_atom\_site\_label\_1  
\_geom\_bond\_atom\_site\_label\_2  
\_geom\_bond\_distance  
\_geom\_bond\_site\_symmetry\_2  
\_geom\_bond\_publ\_flag

C1 C11 1.515(6) . ?  
C1 C2 1.533(7) . ?  
C1 H1A 0.9700 . ?  
C1 H1B 0.9700 . ?  
C11 C16 1.349(7) . ?  
C11 C12 1.373(7) . ?  
C12 C13 1.389(8) . ?  
C12 H12 0.9300 . ?  
C13 C14 1.356(8) . ?  
C13 H13 0.9300 . ?  
C14 C15 1.380(8) . ?  
C14 H14 0.9300 . ?  
C15 C16 1.421(8) . ?  
C15 H15 0.9300 . ?  
C16 H16 0.9300 . ?  
C2 N1 1.472(7) . ?  
C2 C3 1.543(6) . ?  
C2 H2 0.9800 . ?  
N1 H1C 0.8600 . ?  
N1 H1D 0.8600 . ?

C3 O3 1.225(6) . ?  
C3 N2 1.344(7) . ?  
N2 C4 1.469(7) . ?  
N2 H2A 0.8600 . ?  
C4 C5' 1.114(14) . ?  
C4 C5 1.469(10) . ?  
C4 H4A1 0.9700 . ?  
C4 H4B2 0.9700 . ?  
C4 H4C 0.9699 . ?  
C4 H4D 0.9698 . ?  
C5 C6 1.591(12) . ?  
C5 H4D 0.8116 . ?  
C5 H5A 0.9700 . ?  
C5 H5B 0.9700 . ?  
C6 C7 1.439(13) . ?  
C6 H6A 0.9700 . ?  
C6 H6B 0.9700 . ?  
C6 H7D 0.8556 . ?  
C7 C6' 1.114(15) . ?  
C7 N3 1.483(8) . ?  
C7 H7A 0.9700 . ?  
C7 H7B 0.9700 . ?  
C7 H7C 0.9700 . ?  
C7 H7D 0.9700 . ?  
C5' C6' 1.513(18) . ?  
C5' H5'1 0.9700 . ?  
C5' H5'2 0.9700 . ?  
C6' H6'1 0.9700 . ?  
C6' H6'2 0.9700 . ?  
N3 C8 1.310(7) . ?  
N3 H3 0.8601 . ?  
C8 O8 1.255(6) . ?  
C8 C10 1.512(7) . ?  
C9 C91 1.510(7) . ?  
C9 C10 1.539(7) . ?  
C9 H9A 0.9700 . ?  
C9 H9B 0.9700 . ?  
C91 C92 1.389(9) . ?  
C91 C96 1.417(8) . ?  
C92 C93 1.368(8) . ?  
C92 H92 0.9300 . ?  
C93 C94 1.416(9) . ?  
C93 H93 0.9300 . ?  
C94 C95 1.356(9) . ?  
C94 H94 0.9300 . ?  
C95 C96 1.372(8) . ?  
C95 H95 0.9300 . ?  
C96 H96 0.9300 . ?  
C10 N4 1.426(6) . ?  
C10 H10 0.9800 . ?  
N4 H4A 0.8600 . ?  
N4 H4B 0.8600 . ?  
C1A C11A 1.485(7) . ?  
C1A C2A 1.543(7) . ?  
C1A H1A1 0.9700 . ?  
C1A H1A2 0.9700 . ?  
C11A C12A 1.382(8) . ?  
C11A C16A 1.388(8) . ?  
C12A C13A 1.404(8) . ?  
C12A H12A 0.9300 . ?  
C13A C14A 1.382(9) . ?  
C13A H13A 0.9300 . ?  
C14A C15A 1.376(9) . ?  
C14A H14A 0.9300 . ?  
C15A C16A 1.407(9) . ?

C15A H15A 0.9300 . ?  
C16A H16A 0.9300 . ?  
C2A N1A 1.473(6) . ?  
C2A C3A 1.495(7) . ?  
C2A H2B 0.9800 . ?  
N1A H1A3 0.8600 . ?  
N1A H1A4 0.8600 . ?  
C3A O3A 1.273(7) . ?  
C3A N2A 1.314(7) . ?  
N2A C4A 1.533(10) . ?  
N2A H2A1 0.8600 . ?  
C4A C5A 0.904(12) . ?  
C4A C5" 1.164(15) . ?  
C4A H4E 0.9700 . ?  
C4A H4F 0.9700 . ?  
C4A H4G 0.9700 . ?  
C4A H4H 0.9700 . ?  
C5A C6A 1.507(13) . ?  
C5A H4G 1.3392 . ?  
C5A H4H 0.6321 . ?  
C5A H5A1 0.9700 . ?  
C5A H5A2 0.9700 . ?  
C6A C7A 1.352(11) . ?  
C6A H6A1 0.9700 . ?  
C6A H6A2 0.9700 . ?  
C6A H7H 0.9598 . ?  
C7A N3A 1.454(7) . ?  
C7A C6" 1.47(2) . ?  
C7A H7E 0.9700 . ?  
C7A H7F 0.9700 . ?  
C7A H7G 0.9700 . ?  
C7A H7H 0.9698 . ?  
C5" C6" 1.78(2) . ?  
C5" H5"1 0.9700 . ?  
C5" H5"2 0.9700 . ?  
C6" H6"1 0.9700 . ?  
C6" H6"2 0.9700 . ?  
N3A C8A 1.346(6) . ?  
N3A H3A 0.8600 . ?  
C8A O8A 1.238(6) . ?  
C8A C10A 1.502(6) . ?  
C9A C91A 1.497(7) . ?  
C9A C10A 1.539(7) . ?  
C9A H9A1 0.9700 . ?  
C9A H9A2 0.9700 . ?  
C91A C96A 1.396(7) . ?  
C91A C92A 1.393(7) . ?  
C92A C93A 1.392(8) . ?  
C92A H92A 0.9300 . ?  
C93A C94A 1.359(9) . ?  
C93A H93A 0.9300 . ?  
C94A C95A 1.397(9) . ?  
C94A H94A 0.9300 . ?  
C95A C96A 1.365(7) . ?  
C95A H95A 0.9300 . ?  
C96A H96A 0.9300 . ?  
C10A N4A 1.450(7) . ?  
C10A H10A 0.9800 . ?  
N4A H4A1 0.8600 . ?  
N4A H4A2 0.8600 . ?

loop\_

\_geom\_angle\_atom\_site\_label\_1  
\_geom\_angle\_atom\_site\_label\_2  
\_geom\_angle\_atom\_site\_label\_3

\_geom\_angle  
\_geom\_angle\_site\_symmetry\_1  
\_geom\_angle\_site\_symmetry\_3  
\_geom\_angle\_publ\_flag  
C11 C1 C2 114.1(4) . . ?  
C11 C1 H1A 108.7 . . ?  
C2 C1 H1A 108.7 . . ?  
C11 C1 H1B 108.7 . . ?  
C2 C1 H1B 108.7 . . ?  
H1A C1 H1B 107.6 . . ?  
C16 C11 C12 120.1(5) . . ?  
C16 C11 C1 119.0(4) . . ?  
C12 C11 C1 120.9(5) . . ?  
C11 C12 C13 119.4(5) . . ?  
C11 C12 H12 120.3 . . ?  
C13 C12 H12 120.3 . . ?  
C14 C13 C12 121.8(5) . . ?  
C14 C13 H13 119.1 . . ?  
C12 C13 H13 119.1 . . ?  
C13 C14 C15 119.1(5) . . ?  
C13 C14 H14 120.4 . . ?  
C15 C14 H14 120.4 . . ?  
C14 C15 C16 119.0(5) . . ?  
C14 C15 H15 120.5 . . ?  
C16 C15 H15 120.5 . . ?  
C11 C16 C15 120.6(5) . . ?  
C11 C16 H16 119.7 . . ?  
C15 C16 H16 119.7 . . ?  
N1 C2 C3 110.3(4) . . ?  
N1 C2 C1 111.9(4) . . ?  
C3 C2 C1 107.0(4) . . ?  
N1 C2 H2 109.2 . . ?  
C3 C2 H2 109.2 . . ?  
C1 C2 H2 109.2 . . ?  
C2 N1 H1C 120.0 . . ?  
C2 N1 H1D 120.0 . . ?  
H1C N1 H1D 120.0 . . ?  
O3 C3 N2 122.3(4) . . ?  
O3 C3 C2 122.2(4) . . ?  
N2 C3 C2 115.4(4) . . ?  
C3 N2 C4 122.5(4) . . ?  
C3 N2 H2A 119.3 . . ?  
C4 N2 H2A 118.2 . . ?  
C5' C4 C5 79.9(10) . . ?  
C5' C4 N2 122.4(9) . . ?  
C5 C4 N2 112.0(6) . . ?  
C5' C4 H4A1 29.4 . . ?  
C5 C4 H4A1 109.3 . . ?  
N2 C4 H4A1 109.2 . . ?  
C5' C4 H4B2 119.6 . . ?  
C5 C4 H4B2 109.1 . . ?  
N2 C4 H4B2 109.2 . . ?  
H4A1 C4 H4B2 107.9 . . ?  
C5' C4 H4C 106.9 . . ?  
C5 C4 H4C 128.5 . . ?  
N2 C4 H4C 106.4 . . ?  
H4A1 C4 H4C 88.1 . . ?  
H4B2 C4 H4C 23.0 . . ?  
C5' C4 H4D 108.1 . . ?  
C5 C4 H4D 31.1 . . ?  
N2 C4 H4D 105.8 . . ?  
H4A1 C4 H4D 136.3 . . ?  
H4B2 C4 H4D 83.7 . . ?  
H4C C4 H4D 106.2 . . ?  
C4 C5 C6 116.6(7) . . ?

C4 C5 H4D 38.1 . . ?  
C6 C5 H4D 110.9 . . ?  
C4 C5 H5A 108.1 . . ?  
C6 C5 H5A 108.1 . . ?  
H4D C5 H5A 137.6 . . ?  
C4 C5 H5B 108.2 . . ?  
C6 C5 H5B 108.2 . . ?  
H4D C5 H5B 75.3 . . ?  
H5A C5 H5B 107.3 . . ?  
C7 C6 C5 108.1(8) . . ?  
C7 C6 H6A 110.1 . . ?  
C5 C6 H6A 110.1 . . ?  
C7 C6 H6B 110.1 . . ?  
C5 C6 H6B 110.1 . . ?  
H6A C6 H6B 108.4 . . ?  
C7 C6 H7D 40.9 . . ?  
C5 C6 H7D 93.1 . . ?  
H6A C6 H7D 149.1 . . ?  
H6B C6 H7D 80.8 . . ?  
C6' C7 C6 82.9(10) . . ?  
C6' C7 N3 136.0(10) . . ?  
C6 C7 N3 103.9(7) . . ?  
C6' C7 H7A 32.4 . . ?  
C6 C7 H7A 111.0 . . ?  
N3 C7 H7A 111.0 . . ?  
C6' C7 H7B 106.5 . . ?  
C6 C7 H7B 111.0 . . ?  
N3 C7 H7B 111.0 . . ?  
H7A C7 H7B 109.0 . . ?  
C6' C7 H7C 100.4 . . ?  
C6 C7 H7C 138.0 . . ?  
N3 C7 H7C 102.1 . . ?  
H7A C7 H7C 89.3 . . ?  
H7B C7 H7C 27.6 . . ?  
C6' C7 H7D 103.9 . . ?  
C6 C7 H7D 35.3 . . ?  
N3 C7 H7D 105.7 . . ?  
H7A C7 H7D 136.3 . . ?  
H7B C7 H7D 77.9 . . ?  
H7C C7 H7D 105.5 . . ?  
C4 C5' C6' 116.8(13) . . ?  
C4 C5' H5'1 108.1 . . ?  
C6' C5' H5'1 108.2 . . ?  
C4 C5' H5'2 108.1 . . ?  
C6' C5' H5'2 108.0 . . ?  
H5'1 C5' H5'2 107.3 . . ?  
C7 C6' C5' 125.5(14) . . ?  
C7 C6' H6'1 106.1 . . ?  
C5' C6' H6'1 106.0 . . ?  
C7 C6' H6'2 105.8 . . ?  
C5' C6' H6'2 105.9 . . ?  
H6'1 C6' H6'2 106.3 . . ?  
C8 N3 C7 122.6(5) . . ?  
C8 N3 H3 114.4 . . ?  
C7 N3 H3 122.8 . . ?  
O8 C8 N3 122.8(5) . . ?  
O8 C8 C10 119.4(5) . . ?  
N3 C8 C10 117.9(4) . . ?  
C91 C9 C10 113.7(5) . . ?  
C91 C9 H9A 108.8 . . ?  
C10 C9 H9A 108.8 . . ?  
C91 C9 H9B 108.8 . . ?  
C10 C9 H9B 108.8 . . ?  
H9A C9 H9B 107.7 . . ?  
C92 C91 C96 118.4(5) . . ?

C92 C91 C9 121.4(6) . . ?  
C96 C91 C9 120.1(6) . . ?  
C93 C92 C91 122.2(6) . . ?  
C93 C92 H92 118.9 . . ?  
C91 C92 H92 118.9 . . ?  
C92 C93 C94 118.5(6) . . ?  
C92 C93 H93 120.7 . . ?  
C94 C93 H93 120.8 . . ?  
C95 C94 C93 119.6(6) . . ?  
C95 C94 H94 120.2 . . ?  
C93 C94 H94 120.2 . . ?  
C94 C95 C96 122.5(6) . . ?  
C94 C95 H95 118.8 . . ?  
C96 C95 H95 118.8 . . ?  
C95 C96 C91 118.8(6) . . ?  
C95 C96 H96 120.6 . . ?  
C91 C96 H96 120.6 . . ?  
N4 C10 C9 111.2(5) . . ?  
N4 C10 C8 111.8(4) . . ?  
C9 C10 C8 107.0(4) . . ?  
N4 C10 H10 108.9 . . ?  
C9 C10 H10 108.9 . . ?  
C8 C10 H10 108.9 . . ?  
C10 N4 H4A 120.0 . . ?  
C10 N4 H4B 120.0 . . ?  
H4A N4 H4B 120.0 . . ?  
C11A C1A C2A 113.7(4) . . ?  
C11A C1A H1A1 108.8 . . ?  
C2A C1A H1A1 108.8 . . ?  
C11A C1A H1A2 108.8 . . ?  
C2A C1A H1A2 108.8 . . ?  
H1A1 C1A H1A2 107.7 . . ?  
C12A C11A C16A 117.8(5) . . ?  
C12A C11A C1A 121.4(5) . . ?  
C16A C11A C1A 120.8(5) . . ?  
C11A C12A C13A 120.6(5) . . ?  
C11A C12A H12A 119.7 . . ?  
C13A C12A H12A 119.7 . . ?  
C14A C13A C12A 120.5(6) . . ?  
C14A C13A H13A 119.8 . . ?  
C12A C13A H13A 119.8 . . ?  
C13A C14A C15A 120.1(6) . . ?  
C13A C14A H14A 119.9 . . ?  
C15A C14A H14A 119.9 . . ?  
C14A C15A C16A 118.6(6) . . ?  
C14A C15A H15A 120.7 . . ?  
C16A C15A H15A 120.7 . . ?  
C11A C16A C15A 122.3(5) . . ?  
C11A C16A H16A 118.8 . . ?  
C15A C16A H16A 118.8 . . ?  
N1A C2A C3A 112.0(4) . . ?  
N1A C2A C1A 109.0(4) . . ?  
C3A C2A C1A 107.3(4) . . ?  
N1A C2A H2B 109.5 . . ?  
C3A C2A H2B 109.5 . . ?  
C1A C2A H2B 109.5 . . ?  
C2A N1A H1A3 120.0 . . ?  
C2A N1A H1A4 120.0 . . ?  
H1A3 N1A H1A4 120.0 . . ?  
O3A C3A N2A 122.8(5) . . ?  
O3A C3A C2A 120.0(5) . . ?  
N2A C3A C2A 117.2(5) . . ?  
C3A N2A C4A 122.5(5) . . ?  
C3A N2A H2A1 120.1 . . ?  
C4A N2A H2A1 109.8 . . ?

C5A C4A C5" 104.2(13) . . ?  
C5A C4A N2A 159.8(11) . . ?  
C5" C4A N2A 92.3(10) . . ?  
C5A C4A H4E 96.1 . . ?  
C5" C4A H4E 18.1 . . ?  
N2A C4A H4E 96.2 . . ?  
C5A C4A H4F 96.3 . . ?  
C5" C4A H4F 86.3 . . ?  
N2A C4A H4F 96.3 . . ?  
H4E C4A H4F 103.4 . . ?  
C5A C4A H4G 91.1 . . ?  
C5" C4A H4G 83.7 . . ?  
N2A C4A H4G 102.3 . . ?  
H4E C4A H4G 100.1 . . ?  
H4F C4A H4G 6.5 . . ?  
C5A C4A H4H 39.2 . . ?  
C5" C4A H4H 140.5 . . ?  
N2A C4A H4H 121.3 . . ?  
H4E C4A H4H 126.7 . . ?  
H4F C4A H4H 107.9 . . ?  
H4G C4A H4H 106.3 . . ?  
C4A C5A C6A 134.4(13) . . ?  
C4A C5A H4G 46.4 . . ?  
C6A C5A H4G 99.1 . . ?  
C4A C5A H4H 76.0 . . ?  
C6A C5A H4H 147.4 . . ?  
H4G C5A H4H 97.3 . . ?  
C4A C5A H5A1 103.6 . . ?  
C6A C5A H5A1 103.7 . . ?  
H4G C5A H5A1 149.9 . . ?  
H4H C5A H5A1 73.4 . . ?  
C4A C5A H5A2 103.5 . . ?  
C6A C5A H5A2 103.7 . . ?  
H4G C5A H5A2 87.9 . . ?  
H4H C5A H5A2 49.1 . . ?  
H5A1 C5A H5A2 105.3 . . ?  
C7A C6A C5A 117.8(8) . . ?  
C7A C6A H6A1 107.9 . . ?  
C5A C6A H6A1 107.9 . . ?  
C7A C6A H6A2 107.8 . . ?  
C5A C6A H6A2 107.8 . . ?  
H6A1 C6A H6A2 107.2 . . ?  
C7A C6A H7H 45.8 . . ?  
C5A C6A H7H 109.2 . . ?  
H6A1 C6A H7H 142.0 . . ?  
H6A2 C6A H7H 68.5 . . ?  
C6A C7A N3A 118.3(6) . . ?  
C6A C7A C6" 57.2(9) . . ?  
N3A C7A C6" 111.1(9) . . ?  
C6A C7A H7E 107.7 . . ?  
N3A C7A H7E 107.7 . . ?  
C6" C7A H7E 55.6 . . ?  
C6A C7A H7F 107.8 . . ?  
N3A C7A H7F 107.8 . . ?  
C6" C7A H7F 140.8 . . ?  
H7E C7A H7F 107.1 . . ?  
C6A C7A H7G 131.1 . . ?  
N3A C7A H7G 108.9 . . ?  
C6" C7A H7G 116.9 . . ?  
H7E C7A H7G 67.0 . . ?  
H7F C7A H7G 41.9 . . ?  
C6A C7A H7H 45.2 . . ?  
N3A C7A H7H 109.6 . . ?  
C6" C7A H7H 102.1 . . ?  
H7E C7A H7H 141.7 . . ?

H7F C7A H7H 69.2 . . ?  
H7G C7A H7H 107.8 . . ?  
C4A C5" C6" 105.7(14) . . ?  
C4A C5" H5"1 111.0 . . ?  
C6" C5" H5"1 110.7 . . ?  
C4A C5" H5"2 110.4 . . ?  
C6" C5" H5"2 110.3 . . ?  
H5"1 C5" H5"2 108.7 . . ?  
C7A C6" C5" 117.4(13) . . ?  
C7A C6" H6"1 108.0 . . ?  
C5" C6" H6"1 108.1 . . ?  
C7A C6" H6"2 107.9 . . ?  
C5" C6" H6"2 107.7 . . ?  
H6"1 C6" H6"2 107.2 . . ?  
C8A N3A C7A 122.1(5) . . ?  
C8A N3A H3A 119.8 . . ?  
C7A N3A H3A 118.1 . . ?  
O8A C8A N3A 122.1(4) . . ?  
O8A C8A C10A 121.4(4) . . ?  
N3A C8A C10A 116.4(4) . . ?  
C91A C9A C10A 116.0(4) . . ?  
C91A C9A H9A1 108.3 . . ?  
C10A C9A H9A1 108.3 . . ?  
C91A C9A H9A2 108.3 . . ?  
C10A C9A H9A2 108.3 . . ?  
H9A1 C9A H9A2 107.4 . . ?  
C96A C91A C92A 118.0(4) . . ?  
C96A C91A C9A 120.8(5) . . ?  
C92A C91A C9A 121.1(4) . . ?  
C93A C92A C91A 119.7(5) . . ?  
C93A C92A H92A 120.2 . . ?  
C91A C92A H92A 120.2 . . ?  
C94A C93A C92A 122.0(5) . . ?  
C94A C93A H93A 119.0 . . ?  
C92A C93A H93A 119.0 . . ?  
C93A C94A C95A 118.2(5) . . ?  
C93A C94A H94A 120.9 . . ?  
C95A C94A H94A 120.9 . . ?  
C96A C95A C94A 120.8(5) . . ?  
C96A C95A H95A 119.6 . . ?  
C94A C95A H95A 119.6 . . ?  
C95A C96A C91A 121.2(5) . . ?  
C95A C96A H96A 119.4 . . ?  
C91A C96A H96A 119.4 . . ?  
N4A C10A C8A 113.7(4) . . ?  
N4A C10A C9A 108.4(4) . . ?  
C8A C10A C9A 107.5(4) . . ?  
N4A C10A H10A 109.1 . . ?  
C8A C10A H10A 109.1 . . ?  
C9A C10A H10A 109.1 . . ?  
C10A N4A H4A1 120.0 . . ?  
C10A N4A H4A2 120.0 . . ?  
H4A1 N4A H4A2 120.0 . . ?

loop\_

\_geom\_torsion\_atom\_site\_label\_1  
\_geom\_torsion\_atom\_site\_label\_2  
\_geom\_torsion\_atom\_site\_label\_3  
\_geom\_torsion\_atom\_site\_label\_4  
\_geom\_torsion  
\_geom\_torsion\_site\_symmetry\_1  
\_geom\_torsion\_site\_symmetry\_2  
\_geom\_torsion\_site\_symmetry\_3  
\_geom\_torsion\_site\_symmetry\_4  
\_geom\_torsion\_publ\_flag

C2 C1 C11 C16 -86.9(6) . . . . ?  
C2 C1 C11 C12 95.5(6) . . . . ?  
C16 C11 C12 C13 2.6(8) . . . . ?  
C1 C11 C12 C13 -179.8(5) . . . . ?  
C11 C12 C13 C14 -2.1(8) . . . . ?  
C12 C13 C14 C15 1.4(8) . . . . ?  
C13 C14 C15 C16 -1.2(8) . . . . ?  
C12 C11 C16 C15 -2.6(8) . . . . ?  
C1 C11 C16 C15 179.8(5) . . . . ?  
C14 C15 C16 C11 1.8(8) . . . . ?  
C11 C1 C2 N1 -65.4(6) . . . . ?  
C11 C1 C2 C3 173.6(4) . . . . ?  
N1 C2 C3 O3 -58.4(6) . . . . ?  
C1 C2 C3 O3 63.5(6) . . . . ?  
N1 C2 C3 N2 124.7(5) . . . . ?  
C1 C2 C3 N2 -113.4(5) . . . . ?  
O3 C3 N2 C4 -8.6(8) . . . . ?  
C2 C3 N2 C4 168.2(5) . . . . ?  
C3 N2 C4 C5' -129.6(11) . . . . ?  
C3 N2 C4 C5 138.5(7) . . . . ?  
C5' C4 C5 C6 64.3(11) . . . . ?  
N2 C4 C5 C6 -174.7(7) . . . . ?  
C4 C5 C6 C7 -66.7(11) . . . . ?  
C5 C6 C7 C6' 53.4(11) . . . . ?  
C5 C6 C7 N3 -170.8(6) . . . . ?  
C5 C4 C5' C6' -66.7(13) . . . . ?  
N2 C4 C5' C6' -176.4(9) . . . . ?  
C6 C7 C6' C5' -73.0(16) . . . . ?  
N3 C7 C6' C5' -175.6(11) . . . . ?  
C4 C5' C6' C7 107(2) . . . . ?  
C6' C7 N3 C8 -163.9(15) . . . . ?  
C6 C7 N3 C8 102.0(9) . . . . ?  
C7 N3 C8 O8 -10.6(11) . . . . ?  
C7 N3 C8 C10 170.7(6) . . . . ?  
C10 C9 C91 C92 109.9(6) . . . . ?  
C10 C9 C91 C96 -70.5(7) . . . . ?  
C96 C91 C92 C93 0.4(8) . . . . ?  
C9 C91 C92 C93 180.0(5) . . . . ?  
C91 C92 C93 C94 0.4(9) . . . . ?  
C92 C93 C94 C95 -1.1(9) . . . . ?  
C93 C94 C95 C96 1.2(9) . . . . ?  
C94 C95 C96 C91 -0.4(9) . . . . ?  
C92 C91 C96 C95 -0.4(8) . . . . ?  
C9 C91 C96 C95 180.0(5) . . . . ?  
C91 C9 C10 N4 -57.8(7) . . . . ?  
C91 C9 C10 C8 179.9(5) . . . . ?  
O8 C8 C10 N4 158.1(5) . . . . ?  
N3 C8 C10 N4 -23.1(8) . . . . ?  
O8 C8 C10 C9 -79.9(7) . . . . ?  
N3 C8 C10 C9 98.8(7) . . . . ?  
C2A C1A C11A C12A -71.9(6) . . . . ?  
C2A C1A C11A C16A 106.9(6) . . . . ?  
C16A C11A C12A C13A -0.7(7) . . . . ?  
C1A C11A C12A C13A 178.1(5) . . . . ?  
C11A C12A C13A C14A 0.6(8) . . . . ?  
C12A C13A C14A C15A 0.2(9) . . . . ?  
C13A C14A C15A C16A -0.7(9) . . . . ?  
C12A C11A C16A C15A 0.2(8) . . . . ?  
C1A C11A C16A C15A -178.7(5) . . . . ?  
C14A C15A C16A C11A 0.6(9) . . . . ?  
C11A C1A C2A N1A -59.2(6) . . . . ?  
C11A C1A C2A C3A 179.3(5) . . . . ?  
N1A C2A C3A O3A 159.1(6) . . . . ?  
C1A C2A C3A O3A -81.3(7) . . . . ?  
N1A C2A C3A N2A -20.9(8) . . . . ?

C1A C2A C3A N2A 98.6(7) . . . . ?  
O3A C3A N2A C4A 22.0(11) . . . . ?  
C2A C3A N2A C4A -157.9(6) . . . . ?  
C3A N2A C4A C5A 111(3) . . . . ?  
C3A N2A C4A C5" -103.8(12) . . . . ?  
C5" C4A C5A C6A 32(2) . . . . ?  
N2A C4A C5A C6A 176(2) . . . . ?  
C4A C5A C6A C7A -87(2) . . . . ?  
C5A C6A C7A N3A 179.5(8) . . . . ?  
C5A C6A C7A C6" 81.5(12) . . . . ?  
C5A C4A C5" C6" -22.0(17) . . . . ?  
N2A C4A C5" C6" 169.7(11) . . . . ?  
C6A C7A C6" C5" -77.3(13) . . . . ?  
N3A C7A C6" C5" 171.8(11) . . . . ?  
C4A C5" C6" C7A 66.4(18) . . . . ?  
C6A C7A N3A C8A 142.7(7) . . . . ?  
C6" C7A N3A C8A -154.2(10) . . . . ?  
C7A N3A C8A O8A -1.6(9) . . . . ?  
C7A N3A C8A C10A 176.4(5) . . . . ?  
C10A C9A C91A C96A 95.8(6) . . . . ?  
C10A C9A C91A C92A -86.3(6) . . . . ?  
C96A C91A C92A C93A -2.2(8) . . . . ?  
C9A C91A C92A C93A 179.8(5) . . . . ?  
C91A C92A C93A C94A 3.9(9) . . . . ?  
C92A C93A C94A C95A -2.4(10) . . . . ?  
C93A C94A C95A C96A -0.8(10) . . . . ?  
C94A C95A C96A C91A 2.4(10) . . . . ?  
C92A C91A C96A C95A -0.9(9) . . . . ?  
C9A C91A C96A C95A 177.1(5) . . . . ?  
O8A C8A C10A N4A -56.9(7) . . . . ?  
N3A C8A C10A N4A 125.1(5) . . . . ?  
O8A C8A C10A C9A 63.0(6) . . . . ?  
N3A C8A C10A C9A -114.9(5) . . . . ?  
C91A C9A C10A N4A -64.0(6) . . . . ?  
C91A C9A C10A C8A 172.7(4) . . . . ?

\_diffn\_measured\_fraction\_theta\_max 0.995  
\_diffn\_refl\_theta\_full 25.00  
\_diffn\_measured\_fraction\_theta\_full 0.999  
\_refine\_diff\_density\_max 0.470  
\_refine\_diff\_density\_min -0.248  
\_refine\_diff\_density\_rms 0.053
